# Supplementary material for: Genome wide association study of incomplete hippocampal inversion in adolescents
Source: PLoS One. 2020 Jan 28;15(1):e0227355. doi: 10.1371/journal.pone.0227355 (PMC6986744; doi:10.1371/journal.pone.0227355)
Supplement: S1 File — (DOCX) [file pone.0227355.s010.docx]

IMAGEN Consortium author list:

Contact: Gunter Schumann (gunter.schumann@kcl.ac.uk)

Tobias Banaschewski18; Gareth J. Barker19; Arun L.W. Bokde20; Uli Bromberg21; Christian Büchel21; Erin Burke Quinlan16; Sylvane Desrivières16; Herta Flor22,23; Hugh Garavan24; Penny Gowland25; Bernd Ittermann26; Marie-Laure Paillère Martinot27; Eric Artiges28; Frauke Nees18,22; Dimitri Papadopoulos Orfanos9; Tomáš Paus29; Luise Poustka30 ; Sarah Hohmann18; Sabina Millenet18; Juliane H. Fröhner15; Robert Whelan31

18Department of Child and Adolescent Psychiatry and Psychotherapy, Central Institute of Mental Health, Medical Faculty Mannheim, Heidelberg University, Square J5, 68159 Mannheim, Germany; 19Department of Neuroimaging, Institute of Psychiatry, Psychology & Neuroscience, King’s College London, United Kingdom; 20Discipline of Psychiatry, School of Medicine and Trinity College Institute of Neuroscience, Trinity College Dublin; 21University Medical Centre Hamburg-Eppendorf, House W34, 3.OG, Martinistr. 52, 20246, Hamburg, Germany; 22Department of Cognitive and Clinical Neuroscience, Central Institute of Mental Health, Medical Faculty Mannheim, Heidelberg University, Square J5, Mannheim, Germany; 23 Department of Psychology, School of Social Sciences, University of Mannheim, 68131 Mannheim, Germany; 24Departments of Psychiatry and Psychology, University of Vermont, 05405 Burlington, Vermont, USA; 25Sir Peter Mansfield Imaging Centre School of Physics and Astronomy, University of Nottingham, University Park, Nottingham, United Kingdom; 26Physikalisch-Technische Bundesanstalt (PTB), Braunschweig and Berlin, Germany [or depending on journal requirements can be: Physikalisch-Technische Bundesanstalt (PTB), Abbestr. 2 – 12, Berlin, Germany; 27Institut National de la Santé et de la Recherche Médicale, INSERM Unit 1000 “Neuroimaging & Psychiatry”, University Paris Sud, University Paris Descartes; Sorbonne Université; and AP-HP, Department of Child and Adolescent Psychiatry, Pitié-Salpêtrière Hospital, Paris, France; 28Institut National de la Santé et de la Recherche Médicale, INSERM Unit 1000 “Neuroimaging & Psychiatry”, University Paris Sud, University Paris Descartes – Sorbonne Paris Cité; and Psychiatry Department 91G16, Orsay Hospital, France; 29Bloorview Research Institute, Holland Bloorview Kids Rehabilitation Hospital and Departments of Psychology and Psychiatry, University of Toronto, Toronto, Ontario, M6A 2E1, Canada;30Department of Child and Adolescent Psychiatry and Psychotherapy, University Medical Centre Göttingen, von-Siebold-Str. 5, 37075, Göttingen, Germany; 31School of Psychology and Global Brain Health Institute, Trinity College Dublin, Ireland;
